# Supplementary material for: The ongoing debate on NBTs and possible roads for the future
Source: Frontiers journal article supplement (doi:10.3389/fpos.2023.1284527), 2024-01-09
Supplement: Table_1.XLSX [file Table_1.XLSX]

## Sheet: Key Figure 1
	Countries	Categorization by the NBTs legal framework	Legislation and documentation
	Argentina	Yes	ARGENTINA. Resolución 173/2015, 12 de mayo de 2015. Secretaría de Agricultura, Ganadería y Pesca (SAGyP). Available at: https://www.argentina.gob.ar/normativa/nacional/resoluci%C3%B3n-173-2015-246978/texto; ARGENTINA. Resolución 701/2011, de 27 de octubre de 2011. Secretaría de Agricultura, Ganadería y Pesca (SAGyP). Available at: https://www.argentina.gob.ar/normativa/nacional/resoluci%C3%B3n-70…
	Australia	Yes	AUSTRALIA. https://www.foodstandards.gov.au/code/proposals/Pages/p1055-definitions-for-gene-technology-and-new-breeding-techniques.aspx; http://www.foodstandards.gov.au/consumer/gmfood/Pages/New-plant-breeding-techniques-in-the-spotlight.aspx.
	Austria	Ongoing discussion	EUROPE. Regulation (EC) No 1829/2003 and Directive 2001/18/EC; “Study on the status of new genomic techniques under Union law and in light of the Court of Justice ruling in Case C-528/16.”; https://crispr-gene-editing-regs-tracker.geneticliteracyproject.org/european-union-crops-food/
	Bangladesh	Ongoing discussion	BANGLADESH. Bangladesh Packaged Food Labeling Act 2017. https://www.fas.usda.gov/data/bangladesh‐bangladesh‐issues‐packaged‐food‐labelling‐act‐2017; Bangladesh Standard for guidelines for the use of nutrition and health claims. https://extranet.who.int/nutrition/gina/sites/default/filesstore/BGD%202008%20Nutrition%20and%20Health%20Claims.pdf
	Belgium	Ongoing discussion	EUROPE. Regulation (EC) No 1829/2003 and Directive 2001/18/EC; “Study on the status of new genomic techniques under Union law and in light of the Court of Justice ruling in Case C-528/16.”; https://crispr-gene-editing-regs-tracker.geneticliteracyproject.org/european-union-crops-food/
	Bolivia	Ongoing discussion	BOLIVIA. Biosafety Regulation of Supreme Decree No. 24676 (Official Gazette of the Plurinational State of Bolivia
	Brazil	Yes	BRASIL. Resolução Normativa Nº 16, de 15 de janeiro de 2018. Estabelece os requisitos técnicos para apresentação de consulta à CTNBio sobre as Técnicas Inovadoras de Melhoramento de Precisão. [Comissão Técnica Nacional de Biossegurança – CTNBio].
	Bulgaria	Ongoing discussion	EUROPE. Regulation (EC) No 1829/2003 and Directive 2001/18/EC; “Study on the status of new genomic techniques under Union law and in light of the Court of Justice ruling in Case C-528/16.”; https://crispr-gene-editing-regs-tracker.geneticliteracyproject.org/european-union-crops-food/
	Burkina Faso	Ongoing discussion	BURKINA FASO. https://www.nepad.org/news/genome-editing-center-of-discussions-burkina-faso.
	Canada	Yes	CANADA. Canadian Food Inspection Agency. Directive Dir 2000-07: Conducting Confined Research Field Trials of Plants with Novel Traits in Canada. 2019. Available at: https:// www.inspection.gc.ca/plant-health/plants-with-novel-traits/applicants/directive-dir-2000-07/eng/1304474667559/1304474738697#a1_1: 28. https://www.canada.ca/en/health-canada/programs/consultation-guidance-novel-foods-regulatio…
	Chile	Yes	CHILE. Resolución N° 1.523/2001, de 6 de julho de 2001. Servicio Agrícola y Ganadero (SAG). Available at: http://www.sag.cl/sites/default/files/RES_1523_2001.pdf.
	China	Ongoing discussion	CHINA. https://crispr-gene-editing-regs-tracker.geneticliteracyproject.org/china-crops-food/
	Colombia	Yes	COLOMBIA. https://crispr-gene-editing-regs-tracker.geneticliteracyproject.org/colombia-crops-food/
	Costa Rica	Ongoing discussion	COSTA RICA. http://www.senasa.gob.hn/images/ACD/2019/ACUERDO-CD-SENASA-008-2019%20GACETA%2035047.PDF.
	Croatia	Ongoing discussion	EUROPE. Regulation (EC) No 1829/2003 and Directive 2001/18/EC; “Study on the status of new genomic techniques under Union law and in light of the Court of Justice ruling in Case C-528/16.”; https://crispr-gene-editing-regs-tracker.geneticliteracyproject.org/european-union-crops-food/
	Cyprus	Ongoing discussion	EUROPE. Regulation (EC) No 1829/2003 and Directive 2001/18/EC; “Study on the status of new genomic techniques under Union law and in light of the Court of Justice ruling in Case C-528/16.”; https://crispr-gene-editing-regs-tracker.geneticliteracyproject.org/european-union-crops-food/
	Czechia	Ongoing discussion	EUROPE. Regulation (EC) No 1829/2003 and Directive 2001/18/EC; “Study on the status of new genomic techniques under Union law and in light of the Court of Justice ruling in Case C-528/16.”; https://crispr-gene-editing-regs-tracker.geneticliteracyproject.org/european-union-crops-food/
	Denmark	Ongoing discussion	EUROPE. Regulation (EC) No 1829/2003 and Directive 2001/18/EC; “Study on the status of new genomic techniques under Union law and in light of the Court of Justice ruling in Case C-528/16.”; https://crispr-gene-editing-regs-tracker.geneticliteracyproject.org/european-union-crops-food/
	Ecuador	Ongoing discussion	ECUADOR. Executive Decree No. 752 in May 2019
	Egypt	Ongoing discussion	EGYPT. African Biosafety Network of Expertise – ABNE (2019). African Biosafety Regulators Improve their Knowledge on Genome Editing Regulations and Establish the African Union Biosafety Regulators Forum. Available online at: http://nepad-abne.net/african-biosafety-regulators-improve-their-knowledge-on-genome-editing-regulations-and-establish-the-african-union-biosafety-regulators-forum/; https://…
	Estonia	Ongoing discussion	EUROPE. Regulation (EC) No 1829/2003 and Directive 2001/18/EC; “Study on the status of new genomic techniques under Union law and in light of the Court of Justice ruling in Case C-528/16.”; https://crispr-gene-editing-regs-tracker.geneticliteracyproject.org/european-union-crops-food/
	Eswatini	Ongoing discussion	ESWATHINI. The Seeds and Plant Varieties Act, 2000. Available online at: http://extwprlegs1.fao.org/docs/pdf/swa91704.pdf
	Ethiopia	Ongoing discussion	ETHIOPIA. https://crispr-gene-editing-regs-tracker.geneticliteracyproject.org/africa-crops-food/
	Finland	Ongoing discussion	EUROPE. Regulation (EC) No 1829/2003 and Directive 2001/18/EC; “Study on the status of new genomic techniques under Union law and in light of the Court of Justice ruling in Case C-528/16.”; https://crispr-gene-editing-regs-tracker.geneticliteracyproject.org/european-union-crops-food/
	France	Ongoing discussion	EUROPE. Regulation (EC) No 1829/2003 and Directive 2001/18/EC; “Study on the status of new genomic techniques under Union law and in light of the Court of Justice ruling in Case C-528/16.”; https://crispr-gene-editing-regs-tracker.geneticliteracyproject.org/european-union-crops-food/
	Germany	Ongoing discussion	EUROPE. Regulation (EC) No 1829/2003 and Directive 2001/18/EC; “Study on the status of new genomic techniques under Union law and in light of the Court of Justice ruling in Case C-528/16.”; https://crispr-gene-editing-regs-tracker.geneticliteracyproject.org/european-union-crops-food/
	Ghana	Ongoing discussion	GHANA. https://allianceforscience.org/blog/2021/12/ghana-resumes-approval-process-for-insect-resistant-cowpea-its-first-gmo-crop/
	Greece	Ongoing discussion	EUROPE. Regulation (EC) No 1829/2003 and Directive 2001/18/EC; “Study on the status of new genomic techniques under Union law and in light of the Court of Justice ruling in Case C-528/16.”; https://crispr-gene-editing-regs-tracker.geneticliteracyproject.org/european-union-crops-food/
	Honduras	Yes	HONDURAS. http://www.senasa.gob.hn/images/ACD/2019/ACUERDO-CD-SENASA-008-2019%20GACETA%2035047.PDF.
	Hungary	Ongoing discussion	EUROPE. Regulation (EC) No 1829/2003 and Directive 2001/18/EC; “Study on the status of new genomic techniques under Union law and in light of the Court of Justice ruling in Case C-528/16.”; https://crispr-gene-editing-regs-tracker.geneticliteracyproject.org/european-union-crops-food/
	India	Advanced discussion	INDIA. https://dbtindia.gov.in/sites/default/files/Draft_Regulatory_Framework_Genome_Editing-9jan2020.pdf .
	Indonesia	Ongoing discussion	INDONESIA.https://apps.fas.usda.gov/newgainapi/api/Report/DownloadReportByFileName?fileName=MOA%20Issues%20Regulation%20on%20Genetically%20Engineered%20Crops%20-%20Paving%20Way%20for%20Commercial%20Cultivation_Jakarta_Indonesia_02-02-2021
	Ireland	Ongoing discussion	EUROPE. Regulation (EC) No 1829/2003 and Directive 2001/18/EC; “Study on the status of new genomic techniques under Union law and in light of the Court of Justice ruling in Case C-528/16.”; https://crispr-gene-editing-regs-tracker.geneticliteracyproject.org/european-union-crops-food/
	Italy	Ongoing discussion	EUROPE. Regulation (EC) No 1829/2003 and Directive 2001/18/EC; “Study on the status of new genomic techniques under Union law and in light of the Court of Justice ruling in Case C-528/16.”; https://crispr-gene-editing-regs-tracker.geneticliteracyproject.org/european-union-crops-food/
	Japan	Yes	JAPAN. https://crispr-gene-editing-regs-tracker.geneticliteracyproject.org/japan-crops-food/
	Kenya	Advanced discussion	KENYA. https://www.biosafetykenya.go.ke/images/GENOME-EDITING-GUIDELINES-FINAL-VERSION-25th-Feb-2022-03.pdf
	Latvia	Ongoing discussion	EUROPE. Regulation (EC) No 1829/2003 and Directive 2001/18/EC; “Study on the status of new genomic techniques under Union law and in light of the Court of Justice ruling in Case C-528/16.”; https://crispr-gene-editing-regs-tracker.geneticliteracyproject.org/european-union-crops-food/
	Lithuania	Ongoing discussion	EUROPE. Regulation (EC) No 1829/2003 and Directive 2001/18/EC; “Study on the status of new genomic techniques under Union law and in light of the Court of Justice ruling in Case C-528/16.”; https://crispr-gene-editing-regs-tracker.geneticliteracyproject.org/european-union-crops-food/
	Luxembourg	Ongoing discussion	EUROPE. Regulation (EC) No 1829/2003 and Directive 2001/18/EC; “Study on the status of new genomic techniques under Union law and in light of the Court of Justice ruling in Case C-528/16.”; https://crispr-gene-editing-regs-tracker.geneticliteracyproject.org/european-union-crops-food/
	Malawi	Ongoing discussion	MALAWI. http://www.fao.org/fileadmin/user_upload/faoweb/plant-treaty/submissions/Farmers_Seed_Systems_in_Malawi_DRAFT.pdf; Republic of Malawi [RoM] (2005). Seed Act (ACT No.9 of 1996) Amended Arrangement of Sections. Available online at: https://www.aripo.org/wp-content/uploads/2018/12/seedact2005.pdf
	Malta	Ongoing discussion	EUROPE. Regulation (EC) No 1829/2003 and Directive 2001/18/EC; “Study on the status of new genomic techniques under Union law and in light of the Court of Justice ruling in Case C-528/16.”; https://crispr-gene-editing-regs-tracker.geneticliteracyproject.org/european-union-crops-food/
	Mexico	Advanced discussion	MEXICO. https://crispr-gene-editing-regs-tracker.geneticliteracyproject.org/mexico-crops-food/
	Myanmar	Ongoing discussion	MYANMAR.https://apps.fas.usda.gov/newgainapi/api/Report/DownloadReportByFileName?fileName=Agricultural%20Biotechnology%20Annual_Rangoon_Burma%20-%20Union%20of_10-20-2019
	Netherlands	Ongoing discussion	EUROPE. Regulation (EC) No 1829/2003 and Directive 2001/18/EC; “Study on the status of new genomic techniques under Union law and in light of the Court of Justice ruling in Case C-528/16.”; https://crispr-gene-editing-regs-tracker.geneticliteracyproject.org/european-union-crops-food/
	New Zealand	Ongoing discussion	NEW ZEALAND. https://crispr-gene-editing-regs-tracker.geneticliteracyproject.org/new-zealand-crops-food/
	Nigeria	Advanced discussion	NIGERIA. https://nbma.gov.ng/wp-content/uploads/2022/03/NATIONAL-GENE-EDITING-GUIDELINE.pdf
	Norway	Ongoing discussion	EUROPE. Regulation (EC) No 1829/2003 and Directive 2001/18/EC; “Study on the status of new genomic techniques under Union law and in light of the Court of Justice ruling in Case C-528/16.”; https://crispr-gene-editing-regs-tracker.geneticliteracyproject.org/european-union-crops-food/; Norwegian Biotechnology Advisory Board (2020) Norwegian Consumers’ Attitudes towards Gene Editing in Norwegian Ag…
	Pakistan	Ongoing discussion	PAKISTAN. https://ecommons.aku.edu/cgi/viewcontent.cgi?article=1296&context=pakistan_ied_pdck; https://apps.fas.usda.gov/newgainapi/api/Report/DownloadReportByFileName?fileName=Agricultural%20Biotechnology%20Annual_Islamabad_Pakistan_10-20-2020
	Paraguay	Yes	PARAGUAY. : https://crispr-gene-editing-regs-tracker.geneticliteracyproject.org/ paraguay-crops-food/; https://conbio.mag.gov.py/media/ckfinder/files/Resolucion%20565%20de%202019.pdf.
	Peru	Ongoing discussion	PERU.https://apps.fas.usda.gov/newgainapi/api/Report/DownloadReportByFileName?fileName=Agricultural%20Biotechnology%20Annual_Lima_Peru_PE2022-0022.pdf
	Philippines	Yes	PHILIPPINES. USDA (United States Department of Agriculture Foreign Agricultural Service)(2021a) Agricultural Biotech Annual Philippines. https://apps.fas.usda.gov/newgainapi/api/Report/DownloadReportByFileName?fileName=Agricultural%20Biotechnology%20Annual_Manila_Philippines_10-20-2021.pdf (January 17, 2022)
	Poland	Ongoing discussion	EUROPE. Regulation (EC) No 1829/2003 and Directive 2001/18/EC; “Study on the status of new genomic techniques under Union law and in light of the Court of Justice ruling in Case C-528/16.”; https://crispr-gene-editing-regs-tracker.geneticliteracyproject.org/european-union-crops-food/
	Portugal	Ongoing discussion	EUROPE. Regulation (EC) No 1829/2003 and Directive 2001/18/EC; “Study on the status of new genomic techniques under Union law and in light of the Court of Justice ruling in Case C-528/16.”; https://crispr-gene-editing-regs-tracker.geneticliteracyproject.org/european-union-crops-food/
	Romania	Ongoing discussion	EUROPE. Regulation (EC) No 1829/2003 and Directive 2001/18/EC; “Study on the status of new genomic techniques under Union law and in light of the Court of Justice ruling in Case C-528/16.”; https://crispr-gene-editing-regs-tracker.geneticliteracyproject.org/european-union-crops-food/
	Russian Federation	Ongoing discussion	RUSSIAN FEDERATION. https://crispr-gene-editing-regs-tracker.geneticliteracyproject.org/russia-crops-food/#:~:text=As%20recently%20as%202020%2C%20Vladimir,GM%20crops%20for%20research%20purposes.
	Slovakia	Ongoing discussion	EUROPE. Regulation (EC) No 1829/2003 and Directive 2001/18/EC; “Study on the status of new genomic techniques under Union law and in light of the Court of Justice ruling in Case C-528/16.”; https://crispr-gene-editing-regs-tracker.geneticliteracyproject.org/european-union-crops-food/
	Slovenia	Ongoing discussion	EUROPE. Regulation (EC) No 1829/2003 and Directive 2001/18/EC; “Study on the status of new genomic techniques under Union law and in light of the Court of Justice ruling in Case C-528/16.”; https://crispr-gene-editing-regs-tracker.geneticliteracyproject.org/european-union-crops-food/
	South Africa	Ongoing discussion	SOUTH AFRICA. https://gain.fas.usda.gov/Download.aspx?p=1347&q=51ee2f85-c423-4b66-9bae-2813c7bc3f6c
	Spain	Ongoing discussion	EUROPE. Regulation (EC) No 1829/2003 and Directive 2001/18/EC; “Study on the status of new genomic techniques under Union law and in light of the Court of Justice ruling in Case C-528/16.”; https://crispr-gene-editing-regs-tracker.geneticliteracyproject.org/european-union-crops-food/
	Sudan	Ongoing discussion	SUDAN. https://allianceforscience.org/blog/2023/07/african-countries-urged-to-embrace-new-breeding-techniques-in-the-fight-against-food-insecurity/; https://www.cbd.int/doc/world/sd/sd-nr-05-en.doc
	Sweden	Ongoing discussion	EUROPE. Regulation (EC) No 1829/2003 and Directive 2001/18/EC; “Study on the status of new genomic techniques under Union law and in light of the Court of Justice ruling in Case C-528/16.”; https://crispr-gene-editing-regs-tracker.geneticliteracyproject.org/european-union-crops-food/
	Switzerland	Ongoing discussion	SWITZERLAND. https://crispr-gene-editing-regs-tracker.geneticliteracyproject.org/switzerland-crops-food/
	Uganda	Ongoing discussion	UGANDA. https://www.parliament.go.ug/news/2968/parliament-approves-gmo-bill
	United Kingdom	Ongoing discussion	UK. House of Commons Science and Technology Committee (2015). Advanced Genetic Techniques for Crop Improvement: Regulation, Risk and Precaution Report. Fifth Report of the Session 2014−2015. Available at: https://publications.parliament.uk/pa/cm201415/cmselect/cmsctech/328/328.pdf; DEFRA (Department for Environment Food & Rural Affairs) (2021a) Genetic Technologies Regulation: Government Response…
	United States of America	Yes	USA. https://www.aphis.usda.gov/aphis/ourfocus/biotechnology/library/pbi-details#:~:text=Under%20its%20biotechnology%20regulations%2C%20USDA,are%20not%20themselves%20plant%20pests; https://crispr-gene-editing-regs-tracker.geneticliteracyproject.org/united-states-crops-food/
	Uruguay	Yes	URUGUAY. https://crispr-gene-editing-regs-tracker.geneticliteracyproject.org/uruguay-crops-food/#:~:text=Uruguay%20regulates%20genetically%20engineered%20plants,of%20crops%20approved%20for%20sale.; Departmental Decree No. 36.554
	Venezuela	Ongoing discussion	VENEZUELA. https://apps.fas.usda.gov/newgainapi/api/report/downloadreportbyfilename?filename=Agricultural%20Biotechnology%20Annual_Caracas_Venezuela_11-21-2017.pdf; https://agriexchange.apeda.gov.in/IR_Standards/Import_Regulation/FoodandAgriculturalImportRegulationsandStandardsCountryReportCaracasVenezuela12312019.pdf; Seeds Law 6.207 (Official Gazette of Venezuela
	Viet Nam	Ongoing discussion	VIET NAM. USDA (United States Department of Agriculture Foreign Agricultural Service)(2021b) Agricultural Biotech Annual Vietnam. https://apps.fas.usda.gov/newgainapi/api/Report/DownloadReportByFileName?fileName=Agricultural%20Biotechnology%20Annual_Hanoi_Vietnam_10-20-2021

## Sheet: Key Figure 2
	Countries	Perspective of the NBTs countries position	Legislation and documentation
	Argentina	Yes with specific regulation	ARGENTINA. Resolución 173/2015, 12 de mayo de 2015. Secretaría de Agricultura, Ganadería y Pesca (SAGyP). Available at: https://www.argentina.gob.ar/normativa/nacional/resoluci%C3%B3n-173-2015-246978/texto; ARGENTINA. Resolución 701/2011, de 27 de octubre de 2011. Secretaría de Agricultura, Ganadería y Pesca (SAGyP). Available at: https://www.argentina.gob.ar/normativa/nacional/resoluci%C3%B3n-70…
	Australia	Yes with specific regulation	AUSTRALIA. https://www.foodstandards.gov.au/code/proposals/Pages/p1055-definitions-for-gene-technology-and-new-breeding-techniques.aspx; http://www.foodstandards.gov.au/consumer/gmfood/Pages/New-plant-breeding-techniques-in-the-spotlight.aspx.
	Austria	No	EUROPE. Regulation (EC) No 1829/2003 and Directive 2001/18/EC; “Study on the status of new genomic techniques under Union law and in light of the Court of Justice ruling in Case C-528/16.”; https://crispr-gene-editing-regs-tracker.geneticliteracyproject.org/european-union-crops-food/
	Bangladesh	Yes whitout specific regulation	BANGLADESH. Bangladesh Packaged Food Labeling Act 2017. https://www.fas.usda.gov/data/bangladesh‐bangladesh‐issues‐packaged‐food‐labelling‐act‐2017; Bangladesh Standard for guidelines for the use of nutrition and health claims. https://extranet.who.int/nutrition/gina/sites/default/filesstore/BGD%202008%20Nutrition%20and%20Health%20Claims.pdf
	Belgium	No	EUROPE. Regulation (EC) No 1829/2003 and Directive 2001/18/EC; “Study on the status of new genomic techniques under Union law and in light of the Court of Justice ruling in Case C-528/16.”; https://crispr-gene-editing-regs-tracker.geneticliteracyproject.org/european-union-crops-food/
	Bolivia	Yes whitout specific regulation	BOLIVIA. Biosafety Regulation of Supreme Decree No. 24676 (Official Gazette of the Plurinational State of Bolivia
	Brazil	Yes with specific regulation	BRASIL. Resolução Normativa Nº 16, de 15 de janeiro de 2018. Estabelece os requisitos técnicos para apresentação de consulta à CTNBio sobre as Técnicas Inovadoras de Melhoramento de Precisão. [Comissão Técnica Nacional de Biossegurança – CTNBio].
	Bulgaria	No	EUROPE. Regulation (EC) No 1829/2003 and Directive 2001/18/EC; “Study on the status of new genomic techniques under Union law and in light of the Court of Justice ruling in Case C-528/16.”; https://crispr-gene-editing-regs-tracker.geneticliteracyproject.org/european-union-crops-food/
	Burkina Faso	Yes with specific regulation	BURKINA FASO. https://www.nepad.org/news/genome-editing-center-of-discussions-burkina-faso.
	Canada	Yes with specific regulation	CANADA. Canadian Food Inspection Agency. Directive Dir 2000-07: Conducting Confined Research Field Trials of Plants with Novel Traits in Canada. 2019. Available at: https:// www.inspection.gc.ca/plant-health/plants-with-novel-traits/applicants/directive-dir-2000-07/eng/1304474667559/1304474738697#a1_1: 28. https://www.canada.ca/en/health-canada/programs/consultation-guidance-novel-foods-regulatio…
	Chile	Yes with specific regulation	CHILE. Resolución N° 1.523/2001, de 6 de julho de 2001. Servicio Agrícola y Ganadero (SAG). Available at: http://www.sag.cl/sites/default/files/RES_1523_2001.pdf.
	China	Yes whitout specific regulation	CHINA. https://crispr-gene-editing-regs-tracker.geneticliteracyproject.org/china-crops-food/
	Colombia	Yes with specific regulation	COLOMBIA. https://crispr-gene-editing-regs-tracker.geneticliteracyproject.org/colombia-crops-food/
	Costa Rica	Yes whitout specific regulation	COSTA RICA. http://www.senasa.gob.hn/images/ACD/2019/ACUERDO-CD-SENASA-008-2019%20GACETA%2035047.PDF.
	Croatia	No	EUROPE. Regulation (EC) No 1829/2003 and Directive 2001/18/EC; “Study on the status of new genomic techniques under Union law and in light of the Court of Justice ruling in Case C-528/16.”; https://crispr-gene-editing-regs-tracker.geneticliteracyproject.org/european-union-crops-food/
	Cyprus	No	EUROPE. Regulation (EC) No 1829/2003 and Directive 2001/18/EC; “Study on the status of new genomic techniques under Union law and in light of the Court of Justice ruling in Case C-528/16.”; https://crispr-gene-editing-regs-tracker.geneticliteracyproject.org/european-union-crops-food/
	Czechia	No	EUROPE. Regulation (EC) No 1829/2003 and Directive 2001/18/EC; “Study on the status of new genomic techniques under Union law and in light of the Court of Justice ruling in Case C-528/16.”; https://crispr-gene-editing-regs-tracker.geneticliteracyproject.org/european-union-crops-food/
	Denmark	No	EUROPE. Regulation (EC) No 1829/2003 and Directive 2001/18/EC; “Study on the status of new genomic techniques under Union law and in light of the Court of Justice ruling in Case C-528/16.”; https://crispr-gene-editing-regs-tracker.geneticliteracyproject.org/european-union-crops-food/
	Ecuador	Yes with specific regulation	ECUADOR. Executive Decree No. 752 in May 2019
	Egypt	No	EGYPT. African Biosafety Network of Expertise – ABNE (2019). African Biosafety Regulators Improve their Knowledge on Genome Editing Regulations and Establish the African Union Biosafety Regulators Forum. Available online at: http://nepad-abne.net/african-biosafety-regulators-improve-their-knowledge-on-genome-editing-regulations-and-establish-the-african-union-biosafety-regulators-forum/; https://…
	Estonia	No	EUROPE. Regulation (EC) No 1829/2003 and Directive 2001/18/EC; “Study on the status of new genomic techniques under Union law and in light of the Court of Justice ruling in Case C-528/16.”; https://crispr-gene-editing-regs-tracker.geneticliteracyproject.org/european-union-crops-food/
	Eswatini	Yes with specific regulation	ESWATHINI. The Seeds and Plant Varieties Act, 2000. Available online at: http://extwprlegs1.fao.org/docs/pdf/swa91704.pdf
	Ethiopia	Yes with specific regulation	ETHIOPIA. https://crispr-gene-editing-regs-tracker.geneticliteracyproject.org/africa-crops-food/
	Finland	No	EUROPE. Regulation (EC) No 1829/2003 and Directive 2001/18/EC; “Study on the status of new genomic techniques under Union law and in light of the Court of Justice ruling in Case C-528/16.”; https://crispr-gene-editing-regs-tracker.geneticliteracyproject.org/european-union-crops-food/
	France	No	EUROPE. Regulation (EC) No 1829/2003 and Directive 2001/18/EC; “Study on the status of new genomic techniques under Union law and in light of the Court of Justice ruling in Case C-528/16.”; https://crispr-gene-editing-regs-tracker.geneticliteracyproject.org/european-union-crops-food/
	Germany	No	EUROPE. Regulation (EC) No 1829/2003 and Directive 2001/18/EC; “Study on the status of new genomic techniques under Union law and in light of the Court of Justice ruling in Case C-528/16.”; https://crispr-gene-editing-regs-tracker.geneticliteracyproject.org/european-union-crops-food/
	Ghana	No	GHANA. https://allianceforscience.org/blog/2021/12/ghana-resumes-approval-process-for-insect-resistant-cowpea-its-first-gmo-crop/
	Greece	No	EUROPE. Regulation (EC) No 1829/2003 and Directive 2001/18/EC; “Study on the status of new genomic techniques under Union law and in light of the Court of Justice ruling in Case C-528/16.”; https://crispr-gene-editing-regs-tracker.geneticliteracyproject.org/european-union-crops-food/
	Honduras	Yes with specific regulation	HONDURAS. http://www.senasa.gob.hn/images/ACD/2019/ACUERDO-CD-SENASA-008-2019%20GACETA%2035047.PDF.
	Hungary	No	EUROPE. Regulation (EC) No 1829/2003 and Directive 2001/18/EC; “Study on the status of new genomic techniques under Union law and in light of the Court of Justice ruling in Case C-528/16.”; https://crispr-gene-editing-regs-tracker.geneticliteracyproject.org/european-union-crops-food/
	India	Yes with specific regulation	INDIA. https://dbtindia.gov.in/sites/default/files/Draft_Regulatory_Framework_Genome_Editing-9jan2020.pdf .
	Indonesia	Yes with specific regulation	INDONESIA.https://apps.fas.usda.gov/newgainapi/api/Report/DownloadReportByFileName?fileName=MOA%20Issues%20Regulation%20on%20Genetically%20Engineered%20Crops%20-%20Paving%20Way%20for%20Commercial%20Cultivation_Jakarta_Indonesia_02-02-2021
	Ireland	No	EUROPE. Regulation (EC) No 1829/2003 and Directive 2001/18/EC; “Study on the status of new genomic techniques under Union law and in light of the Court of Justice ruling in Case C-528/16.”; https://crispr-gene-editing-regs-tracker.geneticliteracyproject.org/european-union-crops-food/
	Italy	No	EUROPE. Regulation (EC) No 1829/2003 and Directive 2001/18/EC; “Study on the status of new genomic techniques under Union law and in light of the Court of Justice ruling in Case C-528/16.”; https://crispr-gene-editing-regs-tracker.geneticliteracyproject.org/european-union-crops-food/
	Japan	Yes with specific regulation	JAPAN. https://crispr-gene-editing-regs-tracker.geneticliteracyproject.org/japan-crops-food/
	Kenya	Yes with specific regulation	KENYA. https://www.biosafetykenya.go.ke/images/GENOME-EDITING-GUIDELINES-FINAL-VERSION-25th-Feb-2022-03.pdf
	Latvia	No	EUROPE. Regulation (EC) No 1829/2003 and Directive 2001/18/EC; “Study on the status of new genomic techniques under Union law and in light of the Court of Justice ruling in Case C-528/16.”; https://crispr-gene-editing-regs-tracker.geneticliteracyproject.org/european-union-crops-food/
	Lithuania	No	EUROPE. Regulation (EC) No 1829/2003 and Directive 2001/18/EC; “Study on the status of new genomic techniques under Union law and in light of the Court of Justice ruling in Case C-528/16.”; https://crispr-gene-editing-regs-tracker.geneticliteracyproject.org/european-union-crops-food/
	Luxembourg	No	EUROPE. Regulation (EC) No 1829/2003 and Directive 2001/18/EC; “Study on the status of new genomic techniques under Union law and in light of the Court of Justice ruling in Case C-528/16.”; https://crispr-gene-editing-regs-tracker.geneticliteracyproject.org/european-union-crops-food/
	Malawi	Yes whitout specific regulation	MALAWI. http://www.fao.org/fileadmin/user_upload/faoweb/plant-treaty/submissions/Farmers_Seed_Systems_in_Malawi_DRAFT.pdf; Republic of Malawi [RoM] (2005). Seed Act (ACT No.9 of 1996) Amended Arrangement of Sections. Available online at: https://www.aripo.org/wp-content/uploads/2018/12/seedact2005.pdf
	Malta	No	EUROPE. Regulation (EC) No 1829/2003 and Directive 2001/18/EC; “Study on the status of new genomic techniques under Union law and in light of the Court of Justice ruling in Case C-528/16.”; https://crispr-gene-editing-regs-tracker.geneticliteracyproject.org/european-union-crops-food/
	Mexico	Yes with specific regulation	MEXICO. https://crispr-gene-editing-regs-tracker.geneticliteracyproject.org/mexico-crops-food/
	Myanmar	Yes whitout specific regulation	MYANMAR.https://apps.fas.usda.gov/newgainapi/api/Report/DownloadReportByFileName?fileName=Agricultural%20Biotechnology%20Annual_Rangoon_Burma%20-%20Union%20of_10-20-2019
	Netherlands	No	EUROPE. Regulation (EC) No 1829/2003 and Directive 2001/18/EC; “Study on the status of new genomic techniques under Union law and in light of the Court of Justice ruling in Case C-528/16.”; https://crispr-gene-editing-regs-tracker.geneticliteracyproject.org/european-union-crops-food/
	New Zealand	Yes with specific regulation	NEW ZEALAND. https://crispr-gene-editing-regs-tracker.geneticliteracyproject.org/new-zealand-crops-food/
	Nigeria	Yes with specific regulation	NIGERIA. https://nbma.gov.ng/wp-content/uploads/2022/03/NATIONAL-GENE-EDITING-GUIDELINE.pdf
	Norway	Yes with specific regulation	EUROPE. Regulation (EC) No 1829/2003 and Directive 2001/18/EC; “Study on the status of new genomic techniques under Union law and in light of the Court of Justice ruling in Case C-528/16.”; https://crispr-gene-editing-regs-tracker.geneticliteracyproject.org/european-union-crops-food/; Norwegian Biotechnology Advisory Board (2020) Norwegian Consumers’ Attitudes towards Gene Editing in Norwegian Ag…
	Pakistan	Yes whitout specific regulation	PAKISTAN. https://ecommons.aku.edu/cgi/viewcontent.cgi?article=1296&context=pakistan_ied_pdck; https://apps.fas.usda.gov/newgainapi/api/Report/DownloadReportByFileName?fileName=Agricultural%20Biotechnology%20Annual_Islamabad_Pakistan_10-20-2020
	Paraguay	Yes with specific regulation	PARAGUAY. : https://crispr-gene-editing-regs-tracker.geneticliteracyproject.org/ paraguay-crops-food/; https://conbio.mag.gov.py/media/ckfinder/files/Resolucion%20565%20de%202019.pdf.
	Peru	No	PERU.https://apps.fas.usda.gov/newgainapi/api/Report/DownloadReportByFileName?fileName=Agricultural%20Biotechnology%20Annual_Lima_Peru_PE2022-0022.pdf
	Philippines	Yes with specific regulation	PHILIPPINES. USDA (United States Department of Agriculture Foreign Agricultural Service)(2021a) Agricultural Biotech Annual Philippines. https://apps.fas.usda.gov/newgainapi/api/Report/DownloadReportByFileName?fileName=Agricultural%20Biotechnology%20Annual_Manila_Philippines_10-20-2021.pdf (January 17, 2022)
	Poland	No	EUROPE. Regulation (EC) No 1829/2003 and Directive 2001/18/EC; “Study on the status of new genomic techniques under Union law and in light of the Court of Justice ruling in Case C-528/16.”; https://crispr-gene-editing-regs-tracker.geneticliteracyproject.org/european-union-crops-food/
	Portugal	Yes with specific regulation	EUROPE. Regulation (EC) No 1829/2003 and Directive 2001/18/EC; “Study on the status of new genomic techniques under Union law and in light of the Court of Justice ruling in Case C-528/16.”; https://crispr-gene-editing-regs-tracker.geneticliteracyproject.org/european-union-crops-food/
	Romania	No	EUROPE. Regulation (EC) No 1829/2003 and Directive 2001/18/EC; “Study on the status of new genomic techniques under Union law and in light of the Court of Justice ruling in Case C-528/16.”; https://crispr-gene-editing-regs-tracker.geneticliteracyproject.org/european-union-crops-food/
	Russian Federation	Yes whitout specific regulation	RUSSIAN FEDERATION. https://crispr-gene-editing-regs-tracker.geneticliteracyproject.org/russia-crops-food/#:~:text=As%20recently%20as%202020%2C%20Vladimir,GM%20crops%20for%20research%20purposes.
	Slovakia	No	EUROPE. Regulation (EC) No 1829/2003 and Directive 2001/18/EC; “Study on the status of new genomic techniques under Union law and in light of the Court of Justice ruling in Case C-528/16.”; https://crispr-gene-editing-regs-tracker.geneticliteracyproject.org/european-union-crops-food/
	Slovenia	No	EUROPE. Regulation (EC) No 1829/2003 and Directive 2001/18/EC; “Study on the status of new genomic techniques under Union law and in light of the Court of Justice ruling in Case C-528/16.”; https://crispr-gene-editing-regs-tracker.geneticliteracyproject.org/european-union-crops-food/
	South Africa	Yes whitout specific regulation	SOUTH AFRICA. https://gain.fas.usda.gov/Download.aspx?p=1347&q=51ee2f85-c423-4b66-9bae-2813c7bc3f6c
	Spain	Yes with specific regulation	EUROPE. Regulation (EC) No 1829/2003 and Directive 2001/18/EC; “Study on the status of new genomic techniques under Union law and in light of the Court of Justice ruling in Case C-528/16.”; https://crispr-gene-editing-regs-tracker.geneticliteracyproject.org/european-union-crops-food/
	Sudan	Yes whitout specific regulation	SUDAN. https://allianceforscience.org/blog/2023/07/african-countries-urged-to-embrace-new-breeding-techniques-in-the-fight-against-food-insecurity/; https://www.cbd.int/doc/world/sd/sd-nr-05-en.doc
	Sweden	No	EUROPE. Regulation (EC) No 1829/2003 and Directive 2001/18/EC; “Study on the status of new genomic techniques under Union law and in light of the Court of Justice ruling in Case C-528/16.”; https://crispr-gene-editing-regs-tracker.geneticliteracyproject.org/european-union-crops-food/
	Switzerland	Yes with specific regulation	SWITZERLAND. https://crispr-gene-editing-regs-tracker.geneticliteracyproject.org/switzerland-crops-food/
	Uganda	No	UGANDA. https://www.parliament.go.ug/news/2968/parliament-approves-gmo-bill
	United Kingdom	Yes with specific regulation	UK. House of Commons Science and Technology Committee (2015). Advanced Genetic Techniques for Crop Improvement: Regulation, Risk and Precaution Report. Fifth Report of the Session 2014−2015. Available at: https://publications.parliament.uk/pa/cm201415/cmselect/cmsctech/328/328.pdf; DEFRA (Department for Environment Food & Rural Affairs) (2021a) Genetic Technologies Regulation: Government Response…
	United States of America	Yes with specific regulation	USA. https://www.aphis.usda.gov/aphis/ourfocus/biotechnology/library/pbi-details#:~:text=Under%20its%20biotechnology%20regulations%2C%20USDA,are%20not%20themselves%20plant%20pests; https://crispr-gene-editing-regs-tracker.geneticliteracyproject.org/united-states-crops-food/
	Uruguay	Yes with specific regulation	URUGUAY. https://crispr-gene-editing-regs-tracker.geneticliteracyproject.org/uruguay-crops-food/#:~:text=Uruguay%20regulates%20genetically%20engineered%20plants,of%20crops%20approved%20for%20sale.; Departmental Decree No. 36.554
	Venezuela	No	VENEZUELA. https://apps.fas.usda.gov/newgainapi/api/report/downloadreportbyfilename?filename=Agricultural%20Biotechnology%20Annual_Caracas_Venezuela_11-21-2017.pdf; https://agriexchange.apeda.gov.in/IR_Standards/Import_Regulation/FoodandAgriculturalImportRegulationsandStandardsCountryReportCaracasVenezuela12312019.pdf; Seeds Law 6.207 (Official Gazette of Venezuela
	Viet Nam	No	VIET NAM. USDA (United States Department of Agriculture Foreign Agricultural Service)(2021b) Agricultural Biotech Annual Vietnam. https://apps.fas.usda.gov/newgainapi/api/Report/DownloadReportByFileName?fileName=Agricultural%20Biotechnology%20Annual_Hanoi_Vietnam_10-20-2021
